# Supplementary material for: Advanced ionic liquid technologies for sustainable reaction intensification
Source: Royal Society of Chemistry journal article supplement (doi:10.1039/d5su00694e), 2026-01-01
Supplement: d5su00694e1.pdf [file d5su00694e1.pdf]

## Supporting information

### Advanced ionic liquid technologies for sustainable reaction intensification

*Pengzhi Bei<sup>a\*</sup>, Jiayin Zhao<sup>a</sup>, Xiaolu Gao<sup>a</sup>, Yuning Qi<sup>a</sup>, Peng Jia<sup>a</sup>, Zehua Cheng<sup>a</sup>, Lili Deng<sup>a</sup>, Xingtang Xu<sup>b\*</sup>, Zhenzhong Li<sup>c\*</sup>*

*<sup>a</sup>School of Petrochemical Engineering, Shenyang University of Technology, Liaoyang, China*

*<sup>b</sup>State Key Laboratory of Clean and Efficient Coal Utilization, Taiyuan University of Technology, Taiyuan, Shanxi, China*

*<sup>c</sup>Liaoyang Petrochemical Company, PetroChina Company Limited,, Liaoyang 111003, Liaoning, China*

Table S1. Representative Case Studies of Reaction Intensification Using Ionic Liquids: Mechanisms and Performance Metrics

| Reaction Type  | Specific Example      | Ionic Liquid (Function)              | Performance Enhancement & Mechanistic Insight                               | Ref. |
|----------------|-----------------------|--------------------------------------|-----------------------------------------------------------------------------|------|
| Esterification | Acetic acid + Ethanol | [BMIM][HSO <sub>4</sub> ] (Brønsted  | Rate Enhancement: Superior to conventional acids.                           | [1]  |
|                | → Ethyl Acetate       | Acid Catalyst & Solvent)             | Mechanism: Combined acid and phase-transfer functionality.                  |      |
| Diels-Alder    | Cyclopentadiene +     | [BMIM][PF <sub>6</sub> ] (Lewis Acid | Rate/Selectivity: Drastically accelerated with controlled stereoselectivity | [2]  |
| Cycloaddition  | Methyl Acrylate       | Catalyst & Solvent)                  | Mechanism: Dienophile activation through Lewis acid-carbonyl interaction.   |      |

| Reaction Type             | Specific Example      | Ionic Liquid (Function)                 | Performance Enhancement & Mechanistic Insight                      | Ref. |
|---------------------------|-----------------------|-----------------------------------------|--------------------------------------------------------------------|------|
| Friedel-Crafts Alkylation | Isobutane + 2-Butene  | Chloroaluminate ILs                     | Selectivity: High for desired products.                            | [3]  |
|                           |                       | (Superacidic Catalyst & Solvent)        | Mechanism: Transition-state stabilization in confined environment. |      |
| Heck Cross-Coupling       | Iodobenzene + Styrene | Palladium Acetate in ILs                | Catalyst Stability: Long-term stability with minimal leaching.     | [4]  |
|                           |                       | (Reaction Medium & Catalyst Stabilizer) | Mechanism: Nanoparticle stabilization and facile separation.       |      |

| Reaction Type    | Specific Example   | Ionic Liquid (Function)                                    | Performance Enhancement & Mechanistic Insight                                                            | Ref. |
|------------------|--------------------|------------------------------------------------------------|----------------------------------------------------------------------------------------------------------|------|
| Hydrogenation    | Cyclohexene →      | Rhodium Nanoparticles in ILs                               | Catalyst Reusability: Maintained conversion with facile separation.                                      | [5]  |
|                  | Cyclohexane        | (Catalyst Dispersion Medium)                               | Mechanism: Dual electrostatic and biphasic stabilization.                                                |      |
| Hydroformylation | 1-Octene → Nonanal | Rh/TPPTS Complex in ILs<br>(Catalyst Immobilization Phase) | Selectivity : High linear selectivity and robust stability.<br>Mechanism: Biphasic catalyst confinement. | [6]  |

## References

- 1 T. Huang, H. Qin, R. Wang, H. Cheng, L. Chen and Z. Qi, *J. Chem. Eng. Data*, 2021, **66**, 2764–2772.
- 2 Z. Dou, W. Tang, P. Xie and S. Zhao, *Chin. J. Chem. Eng.*, 2024, **66**, 180–188.
- 3 L. Schilder, S. Maaß and A. Jess, *Ind. Eng. Chem. Res.*, 2013, **52**, 1877–1885.
- 4 M. Taskin, A. Cognigni, R. Zirbs, E. Reimhult and K. Bica, *RSC Adv.*, 2017, **7**, 41144–41151.
- 5 E. Redel, J. Krämer, R. Thomann and C. Janiak, *J. Organomet. Chem.*, 2009, **694**, 1069–1075.
- 6 X. Jin, J. Feng, Q. Ma, H. Song, Q. Liu, B. Xu, M. Zhang, S. Li and S. Yu, *Green Chem.*, 2019, **21**, 3267–3275
